# Supplementary material
Source: Springer Nature journal article supplement (https://www.springermedizin.de/resource/supplementary/12992_2012_186_MOESM3_ESM.pdf/9616740)
Supplement: MOESM3 [file 9616740]

## Ethical Challenges in Short-Term Global Health Training

Homepage

About the Case Series

Cases

▶ Developing Cultural Understanding

Introduction

Vignette 1

Vignette 2

Vignette 3

Conclusion

▶ Ensuring Personal Safety

▶ Exceeding Level of Training

▶ Ensuring Sustainable and Appropriate Benefits

▶ Addressing "Ancillary Benefits"

▶ Recognizing Burdens

▶ Shifting Resources

▶ Telling the "Truth"

▶ Selecting a Research Project

▶ Understanding Informed Consent for Research

Additional Resources (pdf)

Acknowledgements and Funding

Contact Us

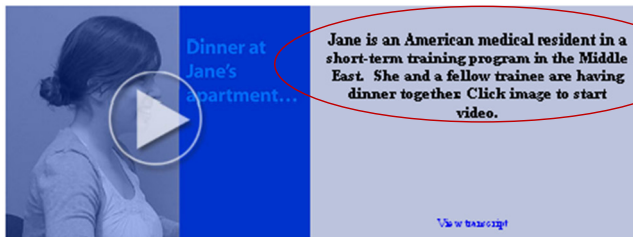

Each case includes an introduction, 3 vignettes, and a conclusion.

A video photo montage introduces each ethical theme.

### CASE 1: Developing Cultural Understanding

**Vignette 1:** Jane is an American medical resident who is doing a 6-week rotation in a hospital clinic in the Middle East. During her stay, she and another medical resident, Ryan have become friends. They live in the same apartment complex and frequently walk to the hospital together. They often find themselves sharing their experiences of the rotation.

In this case, Jane is training in a location where cultural norms prohibit her from having a male friend over for dinner.

**Did Jane make a mistake by having a male colleague over to dinner despite local customs?**

No. Jane and Ryan are both Americans, and it was after "hospital hours".

Although Jane and her male friend are not locals, while they are living in a different culture they should be aware of, and in most cases respect the norms of the local community. Doing so shows respect for the local community, helps build rapport in their collaborative efforts, and is likely to enhance Jane's experience. **Please choose another answer.**

No. Jane did not know she was causing a problem and thus cannot be held accountable for this incident.

Yes. Jane violated cultural norms thereby perhaps jeopardizing her personal safety by casting her as having loose morals.

Yes. At the very least, Jane's biggest mistake was not knowing about this cultural difference in the first place.

A vignette and multiple choice question illuminate each theme.

Real-time corrective feedback appears for an incorrect choice.

[VIEW ALL RESPONSES](#)

[CLICK NEXT TO PROCEED...](#)
